# Supplementary material for: Photochemical functionalisation of optical nanotips with a rhodamine chemosensor for remote through-fiber detection of Hg2+
Source: Royal Society of Chemistry journal article supplement (doi:10.1039/c3ra45198d), 2013-01-01
Supplement: c3ra45198d.pdf [file c3ra45198d.pdf]

Supporting Information for

**Photochemical functionalisation of optical nanotips with a rhodamine chemosensor for remote through-fiber detection of Hg<sup>2+</sup>**

**Kun Chen,<sup>a</sup> Catherine Adam,<sup>b</sup> Neso Sojic,<sup>\*b</sup> and Michael Schmittel<sup>\*a</sup>**

<sup>a</sup> Center of Micro- and Nanochemistry and Engineering, Universität Siegen, Organische Chemie I, Adolf-Reichwein-Strasse 2, D-57068 Siegen, Germany

<sup>b</sup> Groupe Nanosystèmes Analytiques, Institut des Sciences Moléculaires, CNRS UMR 5255, Université Bordeaux I, ENSCPB, 16 avenue Pey-Berland, 33607 Pessac, France.

Table of content

|                                                                                                     |        |
|-----------------------------------------------------------------------------------------------------|--------|
| pH effect on photoluminescence of rhodamine <b>4</b>                                                | Page 2 |
| Absorption spectra of rhodamine <b>4</b> in presence of different cations                           | Page 2 |
| Time response of rhodamine <b>4</b> toward Hg <sup>2+</sup>                                         | Page 2 |
| PL titration of rhodamine <b>4</b> with Hg <sup>2+</sup> in MeCN/ 0.1 M HEPES buffer                | Page 3 |
| Job plot of rhodamine <b>4</b> with Hg <sup>2+</sup>                                                | Page 3 |
| NMR spectra of compound <b>4</b> and [ <b>4</b> + Hg <sup>2+</sup> ]                                | Page 3 |
| Absorption spectra of glass slide functionalised with compound <b>10</b> after irradiation          | Page 4 |
| <i>In situ</i> spectrum of the functionalised optical fiber bundles in presence of Hg <sup>2+</sup> | Page 4 |
| Titration curve of luminescence intensity fiber vs. lg [Hg <sup>2+</sup> ]                          | Page 5 |

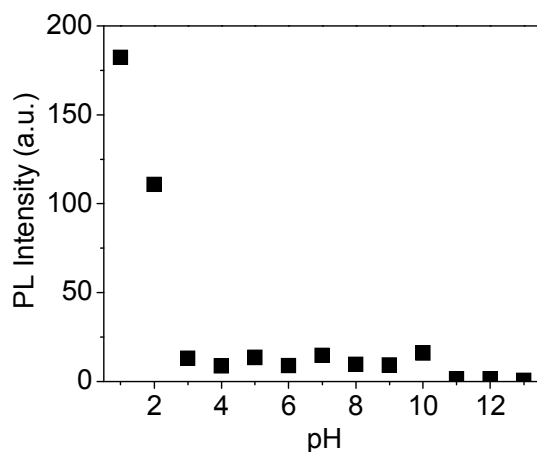

**Fig. S1** PL intensity (at  $\lambda_{em} = 556$  nm) of rhodamine 4 (10  $\mu$ M) in MeCN/buffer (95/5, v/v) from pH 1 to 13 ( $\lambda_{ex} = 520$  nm).

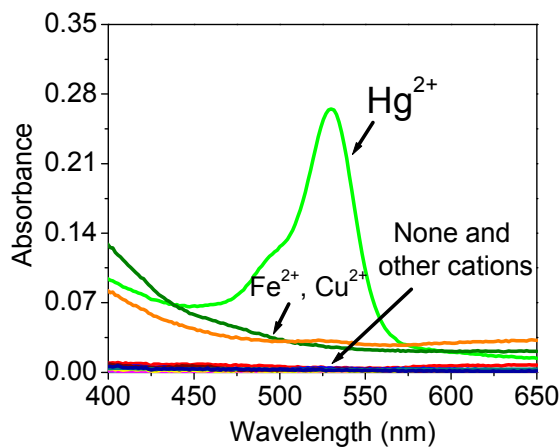

**Fig. S2** UV-Vis absorption spectra of rhodamine 4 (10  $\mu$ M) in presence of different cations in buffer solution (MeCN / 0.1 M HEPES buffer (pH = 7.40  $\pm$  0.10) solution = 95:5, v/v).

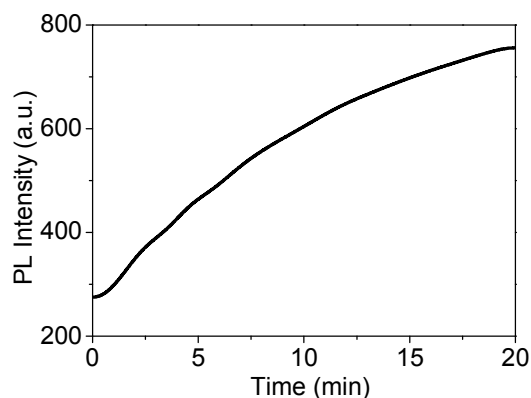

**Fig. S3** Time response of rhodamine 4 (10  $\mu$ M) toward  $Hg^{2+}$  (0.2 mM) in buffer solution (MeCN / 0.1 M HEPES buffer (pH = 7.40  $\pm$  0.10) solution = 95:5, v/v) monitored by PL at  $\lambda_{em} = 556$  nm ( $\lambda_{ex} = 520$  nm).

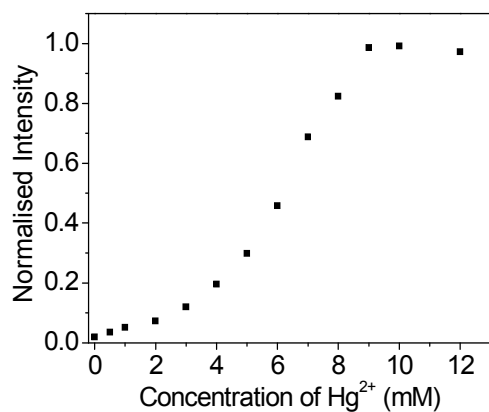

**Fig. S4** PL titration (at  $\lambda_{em} = 556$  nm,  $\lambda_{ex} = 520$  nm) of rhodamine **4** (10  $\mu$ M) in presence of different amounts of Hg<sup>2+</sup> in aqueous buffer solution (MeCN / 0.1 M HEPES buffer (pH = 7.40  $\pm$  0.10) = 50:50, v/v).

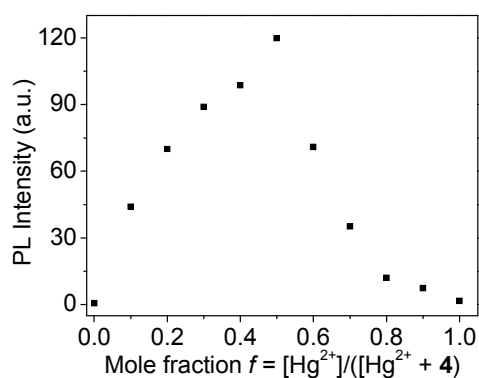

**Fig. S5** Job plot of compound **4** vs. Hg<sup>2+</sup> in MeCN with  $[Hg^{2+}] + [4] = 10$   $\mu$ M followed by PL (at  $\lambda_{em} = 556$  nm,  $\lambda_{ex} = 520$  nm).

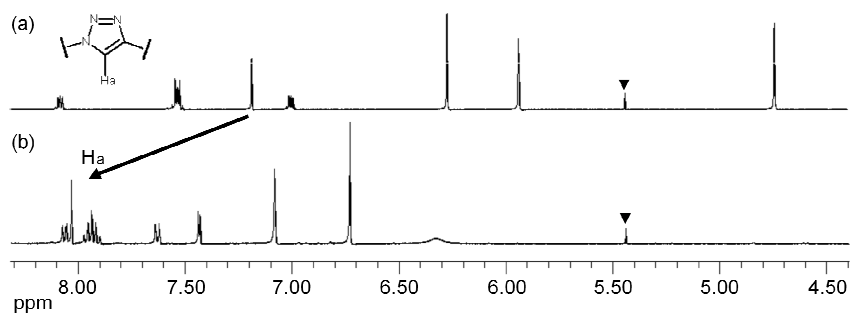

**Fig. S6** <sup>1</sup>H NMR (400 MHz, CD<sub>3</sub>CN) spectra of (a) **4**, (b) **4** + Hg<sup>2+</sup>. Dichloromethane is indicated by ▼.

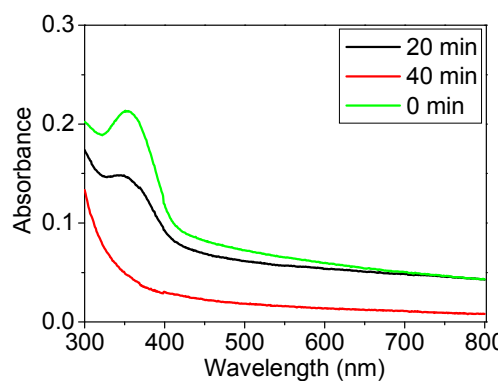

**Fig. S7** UV-Vis absorption spectra of the surface-immobilised compound **10** on the glass slide after irradiation with the LC8 system for different periods of time in methanol.

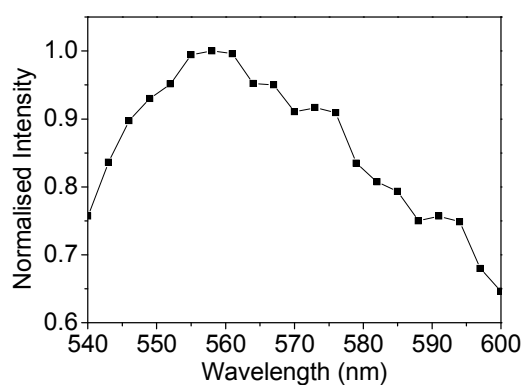

**Fig. S8** The *in-situ* PL spectrum ( $\lambda_{\text{ex}} = 514 \text{ nm}$ ) of the rhodamine-functionalised optical fiber bundles in presence of  $\text{Hg}^{2+}$  (5 mM) in MeCN / 0.1 M HEPES buffer ( $\text{pH} = 7.40 \pm 0.10$ ) = 95:5, v/v.

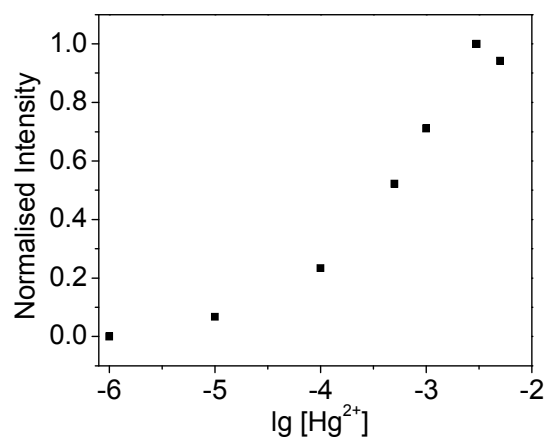

**Fig. S9** Photoluminescence titration ( $\lambda_{\text{em}} = 558 \text{ nm}$ ,  $\lambda_{\text{ex}} = 514 \text{ nm}$ ) of rhodamine-functionalised fiber bundles vs.  $\lg [\text{Hg}^{2+}]$  in MeCN / 0.1 M HEPES buffer solution (pH =  $7.40 \pm 0.10$ ) = 95:5, v/v.
